# Supplementary material
Source: PubMed Central journal article supplement (PMC7709000)
Supplement: jama-e2021218-s001.pdf [file jama-e2021218-s001.pdf]

1  
2  
3  
4  
5  
6  
7  
8  
9  
10  
11  
12  
13  
14  
15

**RESEARCH PROTOCOL:  
EFFECTS OF VAPORISED CANNABIS, WITH AND  
WITHOUT CBD, ON DRIVING AND COGNITION**

16

|                                                                           |                                                                                                                                                                                                                                                                                                                 |
|---------------------------------------------------------------------------|-----------------------------------------------------------------------------------------------------------------------------------------------------------------------------------------------------------------------------------------------------------------------------------------------------------------|
| <b>Protocol ID</b>                                                        | <b>EPU-P112</b>                                                                                                                                                                                                                                                                                                 |
| <b>Short title</b>                                                        | <b>Vaporised cannabis, driving and cognition</b>                                                                                                                                                                                                                                                                |
| <b>EudraCT number</b>                                                     | <b>2018-003945-40</b>                                                                                                                                                                                                                                                                                           |
| <b>Version</b>                                                            | <b><u>1.4</u></b>                                                                                                                                                                                                                                                                                               |
| <b>Date</b>                                                               | <b><u>28 March 2019</u></b>                                                                                                                                                                                                                                                                                     |
| <b>Coordinating investigator/project leader</b>                           | Thomas Arkell                                                                                                                                                                                                                                                                                                   |
| <b>Principal investigator(s) (in Dutch: hoofdonderzoeker/ uitvoerder)</b> | Prof. dr. J.G. Ramaekers<br>Universiteit Maastricht<br>Faculteit der Psychologie en Neurowetenschappen<br>Capgroep Neuropsychologie & Psychofarmacologie<br>Postbus 616<br>6200 MD Maastricht<br>+31 43 3881951<br><a href="mailto:j.ramaekers@maastrichtuniversity.nl">j.ramaekers@maastrichtuniversity.nl</a> |
| <b>Research Group Maastricht</b>                                          | Thomas Arkell (PhD Student)<br>Prof. Dr. Jan Ramaekers<br>Dr. Eef Theunissen<br>Anita van Oers                                                                                                                                                                                                                  |
| <b>Research Group Sydney</b>                                              | Prof. Iain McGregor<br>Prof. Nicholas Lintzeris                                                                                                                                                                                                                                                                 |
| <b>PK analysis / co-investigator (Germany)</b>                            | Prof Dr Stefan Toennes                                                                                                                                                                                                                                                                                          |
| <b><u>Financer of this study</u></b>                                      | The University of Sydney                                                                                                                                                                                                                                                                                        |
| <b>Local sponsor (in Dutch: verrichter/opdrachtgever)</b>                 | Maastricht University                                                                                                                                                                                                                                                                                           |
| <b>Independent expert (s)</b>                                             | Dr. M.P.J. van Boxtel                                                                                                                                                                                                                                                                                           |
| <b>Medical supervisor</b>                                                 | C. van Leeuwen                                                                                                                                                                                                                                                                                                  |
| <b>Laboratory sites</b>                                                   | Department of Neuropsychology &<br>Psychopharmacology, Faculty of Psychology and<br>Neuroscience<br><br>Maastricht University, The Netherlands                                                                                                                                                                  |
| <b>Pharmacy</b>                                                           | n.a.                                                                                                                                                                                                                                                                                                            |

17

18 **PROTOCOL SIGNATURE SHEET**

19

| <b>Name</b>                                                       | <b>Signature</b> | <b>Date</b> |
|-------------------------------------------------------------------|------------------|-------------|
| <b>Head of Department:</b><br><b>Dr. A. Blokland</b>              |                  |             |
| <b>Principal Investigator:</b><br><b>Prof. dr. J.G. Ramaekers</b> |                  |             |

20

21

22

23

24

25

26

27

28

29

30

31

32

33

34 **TABLE OF CONTENTS**

35

|    |                                                                              |    |
|----|------------------------------------------------------------------------------|----|
| 36 | 1. INTRODUCTION AND RATIONALE.....                                           | 9  |
| 37 | 2. OBJECTIVES.....                                                           | 10 |
| 38 | 3. STUDY DESIGN .....                                                        | 11 |
| 39 | 4. STUDY POPULATION.....                                                     | 11 |
| 40 | 4.1 Population (base).....                                                   | 11 |
| 41 | 4.2 Inclusion criteria .....                                                 | 11 |
| 42 | 4.3 Exclusion criteria.....                                                  | 11 |
| 43 | 4.4 Sample size calculation .....                                            | 12 |
| 44 | 5. TREATMENT OF SUBJECTS .....                                               | 12 |
| 45 | 5.1 Investigational product/treatment.....                                   | 12 |
| 46 | 5.2 Use of co-intervention .....                                             | 13 |
| 47 | 5.3 Escape medication.....                                                   | 13 |
| 48 | 6. INVESTIGATIONAL PRODUCT .....                                             | 13 |
| 49 | 6.1 Name and description of investigational product(s).....                  | 13 |
| 50 | 6.2 Summary of findings from non-clinical studies.....                       | 14 |
| 51 | 6.3 Summary of findings from clinical studies .....                          | 15 |
| 52 | 6.4 Summary of known and potential risks and benefits.....                   | 15 |
| 53 | 6.5 Description and justification of route of administration and dosage..... | 15 |
| 54 | 6.6 Dosages, dosage modifications and method of administration.....          | 16 |
| 55 | 6.7 Preparation and labelling of Non-Investigational Medicinal Product.....  | 16 |
| 56 | 6.8 Drug accountability .....                                                | 16 |
| 57 | 7. NON-INVESTIGATIONAL PRODUCT .....                                         | 16 |
| 58 | 7.1 Name and description of non-investigational product(s).....              | 16 |
| 59 | 7.2 Summary of findings from non-clinical studies and clinical studies ..... | 16 |
| 60 | 7.3 Summary of known and potential risks and benefits.....                   | 16 |
| 61 | 7.4 Description and justification of route of administration and dosage..... | 17 |
| 62 | 7.5 Dosages, dosage modifications and method of administration.....          | 17 |
| 63 | 7.6 Preparation and labelling of Non Investigational Medicinal Product ..... | 17 |
| 64 | 7.7 Drug accountability .....                                                | 17 |
| 65 | 8. METHODS .....                                                             | 18 |
| 66 | 8.1 Study outcome measures .....                                             | 18 |
| 67 | 8.1.1 Primary outcomes.....                                                  | 18 |
| 68 | 8.1.2 Secondary outcomes .....                                               | 18 |
| 69 | 8.2 Randomisation, blinding and treatment allocation .....                   | 21 |
| 70 | 8.3 Study procedures.....                                                    | 21 |
| 71 | 8.3.1 Pre-screening .....                                                    | 21 |
| 72 | 8.3.2 Medical screening and training day .....                               | 22 |
| 73 | 8.3.3 Test days .....                                                        | 22 |
| 74 | 8.4 Medical supervision during the study and emergency plan .....            | 24 |
| 75 | 8.5 Withdrawal of individual subjects .....                                  | 25 |
| 76 | 8.6 Replacement of individual subjects after withdrawal .....                | 25 |

|     |       |                                                                    |    |
|-----|-------|--------------------------------------------------------------------|----|
| 77  | 8.7   | Follow-up of subjects withdrawn from treatment.....                | 25 |
| 78  | 8.8   | Premature termination of the study.....                            | 25 |
| 79  | 9.    | SAFETY REPORTING.....                                              | 26 |
| 80  | 9.1   | Temporary halt for reasons of subject safety.....                  | 26 |
| 81  | 9.2   | AEs, SAEs and SUSARs.....                                          | 26 |
| 82  | 9.2.1 | Adverse events (AEs).....                                          | 26 |
| 83  | 9.2.2 | Serious adverse events (SAEs).....                                 | 26 |
| 84  | 9.2.3 | Suspected unexpected serious adverse reactions (SUSARs).....       | 27 |
| 85  | 9.3   | Annual safety report.....                                          | 27 |
| 86  | 9.4   | Follow-up of adverse events.....                                   | 27 |
| 87  | 9.5   | [Data Safety Monitoring Board (DSMB) / Safety Committee].....      | 27 |
| 88  | 10.   | STATISTICAL ANALYSIS.....                                          | 27 |
| 89  | 11.   | ETHICAL CONSIDERATIONS.....                                        | 28 |
| 90  | 11.1  | Regulation statement.....                                          | 28 |
| 91  | 11.2  | Recruitment and consent.....                                       | 28 |
| 92  | 11.3  | Objection by minors or incapacitated subjects (if applicable)..... | 29 |
| 93  | 11.4  | Benefits and risks assessment, group relatedness.....              | 29 |
| 94  | 11.5  | Compensation for injury.....                                       | 30 |
| 95  | 11.6  | Incentives (if applicable).....                                    | 30 |
| 96  | 12.   | ADMINISTRATIVE ASPECTS, MONITORING AND PUBLICATION.....            | 30 |
| 97  | 12.1  | Handling and storage of data and documents.....                    | 31 |
| 98  | 12.2  | Monitoring and Quality Assurance.....                              | 31 |
| 99  | 12.3  | Amendments.....                                                    | 31 |
| 100 | 12.4  | Annual progress report.....                                        | 32 |
| 101 | 12.5  | Temporary halt and (prematurely) end of study report.....          | 32 |
| 102 | 12.6  | Public disclosure and publication policy.....                      | 32 |
| 103 | 13.   | STRUCTURED RISK ANALYSIS.....                                      | 32 |
| 104 | 13.1  | Potential issues of concern.....                                   | 32 |
| 105 | 13.2  | Synthesis.....                                                     | 34 |
| 106 | 14.   | REFERENCES.....                                                    | 35 |
| 107 |       |                                                                    |    |
| 108 |       |                                                                    |    |

109 **LIST OF ABBREVIATIONS AND RELEVANT DEFINITIONS**

110

|                |                                                                                                                                                                                                             |
|----------------|-------------------------------------------------------------------------------------------------------------------------------------------------------------------------------------------------------------|
| <b>ABR</b>     | <b>ABR form, General Assessment and Registration form, is the application form that is required for submission to the accredited Ethics Committee (In Dutch, ABR = Algemene Beoordeling en Registratie)</b> |
| <b>AE</b>      | <b>Adverse Event</b>                                                                                                                                                                                        |
| <b>AR</b>      | <b>Adverse Reaction</b>                                                                                                                                                                                     |
| <b>CA</b>      | <b>Competent Authority</b>                                                                                                                                                                                  |
| <b>CBD</b>     | <b>Cannabidiol</b>                                                                                                                                                                                          |
| <b>CB1</b>     | <b>Cannabinoid receptor 1</b>                                                                                                                                                                               |
| <b>CB2</b>     | <b>Cannabinoid receptor 2</b>                                                                                                                                                                               |
| <b>CCMO</b>    | <b>Central Committee on Research Involving Human Subjects; in Dutch: Centrale Commissie Mensgebonden Onderzoek</b>                                                                                          |
| <b>CT</b>      | <b>Cognitive tests</b>                                                                                                                                                                                      |
| <b>CV</b>      | <b>Curriculum Vitae</b>                                                                                                                                                                                     |
| <b>DAT</b>     | <b>Divided Attention Task</b>                                                                                                                                                                               |
| <b>DS</b>      | <b>Drug screen</b>                                                                                                                                                                                          |
| <b>DSMB</b>    | <b>Data Safety Monitoring Board</b>                                                                                                                                                                         |
| <b>DRM</b>     | <b>Deese/Roediger-McDermott</b>                                                                                                                                                                             |
| <b>ECG</b>     | <b>Electrocardiogram</b>                                                                                                                                                                                    |
| <b>EMCDDA</b>  | <b>European monitoring centre for drugs and drug addictions</b>                                                                                                                                             |
| <b>EU</b>      | <b>European Union</b>                                                                                                                                                                                       |
| <b>EudraCT</b> | <b>European drug regulatory affairs Clinical Trials</b>                                                                                                                                                     |
| <b>FC</b>      | <b>Functional connectivity</b>                                                                                                                                                                              |
| <b>GCP</b>     | <b>Good Clinical Practice</b>                                                                                                                                                                               |
| <b>GCS</b>     | <b>Gudjonsson Compliance Scale</b>                                                                                                                                                                          |
| <b>IB</b>      | <b>Investigator's Brochure</b>                                                                                                                                                                              |
| <b>IC</b>      | <b>Informed Consent</b>                                                                                                                                                                                     |
| <b>GMP</b>     | <b>Good manufacturing practice</b>                                                                                                                                                                          |
| <b>IMP</b>     | <b>Investigational Medicinal Product</b>                                                                                                                                                                    |
| <b>IMPD</b>    | <b>Investigational Medicinal Product Dossier</b>                                                                                                                                                            |
| <b>METC</b>    | <b>Medical research ethics committee (MREC); in Dutch: medisch ethische toetsing commissie (METC)</b>                                                                                                       |
| <b>PVT</b>     | <b>Psychomotor Vigilance Task</b>                                                                                                                                                                           |
| <b>SST</b>     | <b>Stop-Signal Task</b>                                                                                                                                                                                     |

|                |                                                                                                                                                                                                                                                                                                                                                  |
|----------------|--------------------------------------------------------------------------------------------------------------------------------------------------------------------------------------------------------------------------------------------------------------------------------------------------------------------------------------------------|
| <b>TOL</b>     | <b>Tower of London</b>                                                                                                                                                                                                                                                                                                                           |
| <b>(S)AE</b>   | <b>(Serious) Adverse Event</b>                                                                                                                                                                                                                                                                                                                   |
| <b>SDLP</b>    | <b>Standard deviation of lateral position</b>                                                                                                                                                                                                                                                                                                    |
| <b>SPC</b>     | <b>Summary of Product Characteristics (in Dutch: officiële productinformatie IB1-tekst)</b>                                                                                                                                                                                                                                                      |
| <b>SPM</b>     | <b>Statistical parametric mapping</b>                                                                                                                                                                                                                                                                                                            |
| <b>Sponsor</b> | <b>The sponsor is the party that commissions the organisation or performance of the research, for example a pharmaceutical company, academic hospital, scientific organisation or investigator. A party that provides funding for a study but does not commission it is not regarded as the sponsor, but referred to as a subsidising party.</b> |
| <b>SUSAR</b>   | <b>Suspected Unexpected Serious Adverse Reaction</b>                                                                                                                                                                                                                                                                                             |
| <b>THC</b>     | <b><math>\Delta^9</math>-tetrahydrocannabinol</b>                                                                                                                                                                                                                                                                                                |
| <b>VAS</b>     | <b>Visual analogue scale</b>                                                                                                                                                                                                                                                                                                                     |
| <b>Wbp</b>     | <b>Personal Data Protection Act (in Dutch: Wet Bescherming Persoonsgegevens)</b>                                                                                                                                                                                                                                                                 |
| <b>WMO</b>     | <b>Medical Research Involving Human Subjects Act (in Dutch: Wet Medisch-wetenschappelijk Onderzoek met Mensen)</b>                                                                                                                                                                                                                               |

111

112

113 **SUMMARY**

114

115 **Rationale:** There is a growing need to better understand the impact of medicinal cannabis use  
116 on driving. Although prior research suggests that cannabis impairs driving performance in a  
117 dose-dependent manner, it is largely with respect to the effects of  $\Delta$ 9-tetrahydrocannabinol  
118 (THC) in recreational cannabis users. It is not clear to what extent these results can be  
119 generalised to medicinal cannabis users. A recent pilot study suggests that there may be little  
120 difference between high and low CBD cannabis, despite anecdotal reports to the contrary, and  
121 that the effects of cannabis on driving may depend on the complexity of the task. This study  
122 will seek to validate these findings, primarily by using an on-road driving paradigm.

123 **Objective:** To examine and compare the effects of vaporized medicinal grade cannabis  
124 containing known concentrations and doses of the cannabinoids THC and CBD on on-road  
125 driving performance and cognitive function.

126 **Study design:** Within-subjects, double-blind and placebo-controlled. Occasional cannabis  
127 users (N=24) will attend four test sessions, each one week apart, in which driving and  
128 cognitive function will be assessed following vaporisation of (1) THC/CBD containing  
129 cannabis, (2) THC only cannabis, (3) CBD only cannabis and (4) placebo cannabis. The order  
130 of these conditions will be counterbalanced across participants.

131 **Study population:** Twenty-four healthy, occasional cannabis users, aged 20-50.

132 **Intervention (if applicable):** Vaporized Bedrocan, Bedrolite and matched placebo cannabis  
133 (equivalent to 13.75 mg THC and CBD).

134 **Main study parameters/endpoints:** Driving performance will be assessed using the on-road  
135 driving task. Cognitive performance will be assessed using computerised cognitive tasks and  
136 subjective drug effects will be assessed by established self-report and clinician-administered  
137 measures.

138 **Nature and extent of the burden and risks associated with participation, benefit and**  
139 **group relatedness:** All participants will inhale cannabis and placebo vapor and will complete  
140 2 on-road driving assessments in each session.

141



## 142 1. INTRODUCTION AND RATIONALE

143  
144 Experimental studies indicate that cannabis impairs driving performance and certain aspects  
145 of cognitive function in a dose-dependent manner. However, to date, these studies have only  
146 considered the effects of the principal intoxicating component of cannabis -  $\Delta$ 9-  
147 tetrahydrocannabinol (THC) – and have largely involved recreational cannabis users. It is not  
148 clear to what extent these results can be generalized to medicinal cannabis users.

149  
150 In areas where medicinal cannabis is readily accessible, patients have access to an extensive  
151 variety of cannabis chemovars ('strains') and pharmaceutical cannabinoid preparations, many  
152 of which contain a significant amount of Cannabidiol (CBD), such as Sativex, which contains  
153 a 1:1 ratio of THC and CBD. CBD is a non-intoxicating cannabinoid which shows therapeutic  
154 potential in several diseases and conditions, with demonstrated antioxidant, anti-  
155 inflammatory, anxiolytic, anticonvulsant, antipsychotic and analgesic properties [1-5]. CBD is  
156 well tolerated in humans even at doses of up to 1,500 mg/day [6] and has a very good safety  
157 and side-effect profile [7].

158  
159 CBD has been sometimes found to modulate the pharmacological actions of THC and to  
160 dampen some of the adverse psychological effects of THC [8, 9]. There may be some  
161 receptor-level interactions between THC and CBD that mediate such effects, and it has been  
162 shown that CBD acts as a negative allosteric modulator of the CB1 receptor [10].  
163 Additionally, fMRI studies have observed opposite patterns of activation in the amygdala,  
164 prefrontal cortex, anterior cingulate cortex and the cerebellum with THC and CBD [9, 11].  
165 This may have relevance to driving performance and cognitive function.

166  
167 Amongst recreational cannabis users, there is a growing trend toward high-THC chemovars  
168 and highly concentrated THC-rich cannabis extracts. Cannabis users typically prefer these  
169 products as they maximise the intensity and the duration of the 'high'. CBD, owing to its  
170 potential to dampen the effects of THC, is thus undesirable. Medicinal cannabis users, by  
171 contrast, typically wish to maximise the therapeutic effects of cannabis whilst minimising its  
172 psychotomimetic effects which can interfere with daily function. They are thus likely to prefer  
173 high-CBD chemovars which are also lower in THC. Additionally, clinicians are likely to  
174 recommend high-CBD chemovars to patients as they are thought to be more tolerable for  
175 patients who do not have experience with cannabis.

176 Accordingly, it is imperative to establish whether high-CBD chemovars impair driving in the  
177 same way as those containing THC alone. This information will allow clinicians to effectively  
178 tailor medicinal cannabis treatment regimens for patients, and to provide accurate patient  
179 advice concerning the impact of medicinal cannabis treatment on daily functioning. This is  
180 especially important given the dispensary model that is emerging in areas within the United  
181 States, where patients are being given advice on the relative effects of different chemovars by  
182 non-medical staff. Furthermore, this has relevance for therapeutic cannabinoid preparations  
183 such as Sativex, which is licensed in various countries for the treatment of spasticity  
184 associated with MS. At current there is only limited evidence to suggest that long-term use  
185 does not adversely affect standard driving ability in patients with moderate to severe MS  
186 spasticity [12].

187

188 Here we will examine whether vaporised GMP-grade medicinal cannabis containing a 1:1  
189 ratio of THC and CBD impairs driving in the same way as cannabis containing an equivalent  
190 amount of THC with no CBD and compared with CBD alone. This novel study will examine  
191 on-road driving performance at acute (30 min) and post-acute (4 hours) timepoints following  
192 consumption of GMP-grade vaporised medicinal cannabis.

193

## 194 2. OBJECTIVES

195

196 Primary Objective:

- 197 • To assess the influence of cannabis containing varying ratios of THC and CBD and  
198 placebo on driving performance at 30 minutes (peak of acute intoxication phase) and 4  
199 hours later (post-acute intoxication phase)

200

201 Secondary Objective(s):

- 202 • To assess the influence of cannabis containing varying ratios of THC and CBD and  
203 placebo on cognitive performance at 30 minutes (peak of acute intoxication phase) and  
204 4 hours later (post-acute intoxication phase)
- 205 • To assess whether participants can accurately estimate their fitness to drive prior to  
206 driving tests
- 207 • To assess whether CBD alters the subjective drug effects of THC
- 208 • To examine whether CBD modulates the pharmacokinetics of THC, and whether this  
209 might be a relevant mechanism whereby CBD influences THC impairment.

### 210 3. STUDY DESIGN

211  
212 The study will employ a within-subjects, double-blind and placebo-controlled design.  
213 Occasional ( $N=24$ ) cannabis users will receive single doses of cannabis (Bedrocan, Bedrolite  
214 and Placebo) over four separate sessions (with each session separated by a minimum of 7  
215 days) in a randomised and counter-balanced order.

216

### 217 4. STUDY POPULATION

218

#### 219 4.1 Population (base)

220 Healthy, occasional users of cannabis will be recruited (20-50 years).

#### 221 4.2 Inclusion criteria

222 In order to be eligible to participate in this study, a subject must meet all of the following  
223 criteria:

- 224 • Occasional cannabis users ( $>10$  lifetime exposures and  $<2x/week$  in the last 12 months)
- 225 • Age between 20-50
- 226 • Good physical health as determined by medical examination and laboratory analysis
- 227 • Absence of any major medical, endocrine and neurological condition
- 228 • Normal weight, body mass index (weight/height<sup>2</sup>) between 20 and 28 kg/m<sup>2</sup>
- 229 • In possession of a valid driver license with at least 2 years driving experience (having  
230 driven  $> 3000$  km/yr)
- 231 • Written Informed Consent

#### 232 4.3 Exclusion criteria

233 A potential subject who meets any of the following criteria will be excluded from  
234 participation in this study:

- 235 • History of drug abuse (other than the use of cannabis) or addiction (determined by the  
236 medical questionnaire, drug questionnaire and medical examination)
- 237 • Pregnancy or lactation (pregnancy test, if needed)
- 238 • Hypertension (diastolic  $> 90$ ; systolic  $> 140$ )
- 239 • Current or history of psychiatric disorder (determined by the medical questionnaire and  
240 medical examination)
- 241 • Liver dysfunction
- 242 • Use of medications that may impact upon driving ability (e.g. mood stabilisers, sedatives)

- 243 • Any serious prior adverse response to cannabis
- 244 • History of cardiac dysfunctions (e.g. arrhythmia, ischemic heart disease)
- 245 • QT syndrome

#### 246 4.4 Sample size calculation

247 A priori sample size calculation was done by using G\*Power. The effect size was calculated  
 248 from a previous study which compared on-road driving performance after placebo, 10mg and  
 249 20mg dronabinol [13]. Although dronabinol is an oral THC product and its pharmacokinetic  
 250 profile differs from that of vaporized cannabis, it is a prescribed medicinal cannabinoid  
 251 product which produces similar subjective effects, and the dose range is similar to that which  
 252 we will be using in this study. Given the partial eta value of 0.28 associated with a main effect  
 253 of Dronabinol on SDLP and using a nonsphericity correction error value of 0.8 to allow for  
 254 violation of the sphericity assumption, a sample size of 20 is needed for the probability of an  
 255  $\alpha$ -error of .05 ( $\beta$ -error: 0.95). To allow for a drop-out rate of 15-20%, 24 participants will be  
 256 recruited to the study. The power analysis protocol is shown below:

257  
 258 **F tests** - ANOVA: Repeated measures, within factors  
 259 **Analysis:** A priori: Compute required sample size  
 260 **Input:** Effect size  $f(U)$  = 0.6236096  
 261  $\alpha$  err prob = 0.05  
 262 Power (1- $\beta$  err prob) = 0.95  
 263 Number of groups = 1  
 264 Number of measurements = 4  
 265 Nonsphericity correction  $\epsilon$  = 0.8  
 266 **Output:** Noncentrality parameter  $\lambda$  = 17.7333354  
 267 Critical F = 3.0151288  
 268 Numerator df = 2.4000000  
 269 Denominator df = 45.6000000  
 270 Total sample size = 20

271

272

## 273 5. TREATMENT OF SUBJECTS

274

### 275 5.1 Investigational product/treatment

276 Participants will receive a fixed dose of each of the following cannabis varieties:

- 277 • Bedrocan (THC 22% | CBD <1.0%)

278 • Bedrolite (THC<1% | CBD 9%)

279 • Placebo

280

281 The dose of each variety given will be sufficient to deliver 13.75 mg THC and 13.75 mg  
282 CBD. Because of the disparity between THC and CBD cannabinoid concentrations in  
283 Bedrocan and Bedrolite cannabis, active cannabis will be mixed with sufficient placebo  
284 material so that a total of 215 mg plant material is vaporised in each condition according to  
285 the following ratios:

286

287 1) THC:

288 62 mg Bedrocan (THC) + 153 mg placebo = 13.75 mg THC + Nil CBD

289 2) THC/CBD:

290 62 mg Bedrocan (THC) + 153 mg Bedrolite (CBD) = 13.75 mg THC + 13.75mg CBD

291 3) CBD:

292 153 mg Bedrolite (CBD) + 62 mg placebo = 13.75 mg CBD + Nil THC

293 4) Placebo:

294 215 mg Placebo = Nil THC / CBD

295

296 Details of the treatment procedure and described further in Section 6.1.

## 297 **5.2 Use of co-intervention**

298 Participants will be asked to refrain from any drugs during the study period. Subjects will not  
299 be allowed to use alcohol on the day prior to an experimental session.

## 300 **5.3 Escape medication**

301 Not applicable

302

303

# 304 **6. INVESTIGATIONAL PRODUCT**

305

## 306 **6.1 Name and description of investigational product(s)**

307 The following varieties of Bedrocan cannabis flos will be used:

308 • Bedrocan (THC 22% | CBD <1.0%)

309 • Bedrolite (THC<1% | CBD 9%)

310 • Placebo

- 311 • Bedrocan and Bedrolite placebo products retain the terpene profile of the original  
312 strains (i.e. they have the same flavor and smell) but the active cannabinoids have  
313 been extracted to <0.2% of the total weight. As such, they are not psychoactive. To  
314 ensure consistency across sessions, placebo plant material will be added to each active  
315 dose to ensure that participants vaporizer the same amount of total plant material in  
316 each session.

## 317 **6.2 Summary of findings from non-clinical studies**

318 *See also Specification Sheet and product information of Bedrocan and Bedrolite.*

319  $\Delta$ 9-THC is the principal psychoactive constituent of cannabis. The pharmacological actions of  
320 THC result from its partial agonist activity at the cannabinoid receptor CB<sub>1</sub> located mainly in  
321 the central nervous system, and the CB<sub>2</sub> receptor, mainly expressed in cells of the immune  
322 system. THC has mild to moderate analgesic effects, and cannabis can be used to treat pain.  
323 Other effects include relaxation, alteration of visual, auditory, and olfactory senses, fatigue,  
324 and appetite stimulation. THC has marked antiemetic properties, and may also reduce  
325 aggression in certain subjects. CBD is not psychoactive, is well tolerated by humans even at  
326 very high doses and has a very good safety profile (Iffland & Grotenhermen, 2017).

327  
328 Since the 1980s, THC (dronabinol, Marinol, Solvay Pharmaceuticals) and one of its synthetic  
329 analogues, nabilone (Cesamet, Valeant Pharmaceuticals), are being used for the suppression  
330 of nausea and vomiting produced by chemotherapy and, since 1992, Marinol is being used for  
331 the stimulation of appetite in AIDS. In the Netherlands, four types of medicinal cannabis are  
332 available through pharmacies: Bedrocan, Bedrobinol, Bediol and Bedica. The composition  
333 and strength varies from about 6% till 22% THC. Medicinal cannabis is prescribed for pain  
334 and muscle spasms/cramps associated with multiple sclerosis (MS) or spinal cord damage;  
335 nausea, reduced appetite, weight loss and debilitation associated with cancer and AIDS;  
336 nausea and vomiting caused by medication or radiotherapy for cancer and HIV/AIDS; long-  
337 term neurogenic pain and tics associated with Tourette Syndrome.

338  
339 The psychological effects of cannabis can vary widely, depending on the dose, the route of  
340 administration, and personal conditions such as experience with the drug and mood. Use of  
341 cannabis can cause a feeling of euphoria which changes slowly into a pleasant feeling of  
342 calmness and tranquility. Other effects include sedation, cheerfulness, hunger, greater  
343 sensitivity to perceptions of color and music, distorted space-time perception, and lethargy.

344 The altered perception can induce feelings of anxiety, panic and confusion. Also, restlessness  
345 and insomnia have been reported. Cannabis can in rare cases provoke a psychotic reaction,  
346 characterized by delusions and hallucinations. The physical effects of Bedrobinol include:  
347 tachycardia, orthostatic hypotension, headache, dizziness, warmth or cold hands and feet, red  
348 burning eyes, muscular weakness, dry mouth. These effects are temporary and disappear a  
349 few hours after use.

### 350 **6.3 Summary of findings from clinical studies**

351 Not applicable

### 352 **6.4 Summary of known and potential risks and benefits**

353 At doses exceeding the psychotropic threshold, ingestion of cannabis usually causes enhanced  
354 well-being and relaxation with an intensification of ordinary sensory experiences. The most  
355 important acute adverse effects caused by overdosing are anxiety and panic attacks, and with  
356 regard to somatic effects increased heart rate and changes in blood pressure. Regular use of  
357 cannabis may lead to dependency and to a mild withdrawal syndrome.

### 358 **6.5 Description and justification of route of administration and dosage**

359 Each subject will receive a dose equivalent to 13.75mg THC and CB. This dose is similar to  
360 what was used in a previous study (Arkell et al., manuscript under review) testing the effects  
361 of high and low CBD cannabis on simulated driving performance. Participants in this study  
362 reported feeling 'high', and a clear reduction in performance was observed in laboratory tasks  
363 measuring working memory, divided and sustained attention, reaction time, tracking, and  
364 motor function. The administration of cannabis will occur through heating in the Storz and  
365 Bickel Mighty Medic vaporiser. Cannabis plant material will be positioned in the filling  
366 chamber of the device, which will then be heated to 200 °C. Participants will inhale through  
367 the mouthpiece according to a standardized procedure (i.e. inhale 5 seconds, hold 3 seconds,  
368 exhale and rest until 30s has elapsed) for a minimum of 8 inhalations. If vapor is still  
369 observable in exhaled breath after these 8 inhalations, this procedure will continue until vapor  
370 is no longer seen. Appropriate training of the volunteers for the use of a Mighty Medic  
371 vaporizer will be performed during the training session, using the placebo. The preparation of  
372 the vaporizer will be done in the drug administration room by one of the researchers, out of  
373 sight for the participant. This researcher will not be present during the administration or  
374 during the testing of the subjects. The administration will take place in the waiting room with  
375 one of the researchers present.

**376 6.6 Dosages, dosage modifications and method of administration**

377 Vapor of 215mg cannabis (containing 62 mg Bedrocan + 153 mg placebo OR 62 mg  
378 Bedrocan + 153 mg Bedrolite OR 153 mg Bedrolite + 62 mg placebo OR 215mg placebo)  
379 plant material as described in Section 5.1 will be inhaled via vaporisation. This amount of  
380 plant material is sufficient to provide 13.75mg of THC and CBD.

**381 6.7 Preparation and labelling of Non-Investigational Medicinal Product**

382 Bedrocan, Bedrolite and placebo cannabis will be delivered by the Office for Medicinal  
383 Cannabis, and the doses will be weighted and labelled in our drug storage room, using a  
384 calibrated digital MyWeigh scale (type i101).

**385 6.8 Drug accountability**

386 The Office for Medicinal Cannabis will deliver the cannabis to the University where it will be  
387 placed immediately in a safe, in a cool and dark locked room. In the trial master file, there  
388 will be a drug accountability log where information about distribution and return will be  
389 registered.

390

**391 7. NON-INVESTIGATIONAL PRODUCT**

392

**393 7.1 Name and description of non-investigational product(s)**

394 Subjects will also receive placebo, which is Bedrocan cannabis flos that has had the  
395 phytocannabinoids (including THC, the psychoactive component) removed.

**396 7.2 Summary of findings from non-clinical studies and clinical studies**

397 This section is not applicable. Bedrocan placebo retains the precise terpene profile of  
398 Bedrocan cannabis with all cannabinoids removed to <0.2% of dry weight i.e. to a negligible  
399 level. As such, the product is non-psychoactive. This makes it an appropriate placebo and  
400 blinding agent. To date there have been three clinical trials which have successfully used this  
401 product [14-16]. No adverse events with Bedrocan placebo cannabis have been reported. See  
402 also the Product Information Sheet of Bedrocan placebo.

**403 7.3 Summary of known and potential risks and benefits**

404 Not applicable

405



#### 406 **7.4 Description and justification of route of administration and dosage**

407 The amount of Bedrocan placebo cannabis material administered will be equivalent to 215mg  
408 minus the amount of active plant material in each condition and it will be administered via the  
409 Mighty Medic vaporizer (i.e. the same way the Bedrocan is administered). Bedrocan placebo  
410 retains the precise terpene profile of the Bedrocan strain, with all cannabinoids removed to  
411 <0.2% of dry weight. As such, the product is non-psychoactive, but retains the taste of the  
412 original strain, which makes it indistinguishable from its active equivalent during vaporising.  
413 Placebo cannabis plant material will mixed homogenously with active cannabis plant material  
414 and will be positioned in the filling chamber of the device, which will then be heated to 200  
415 °C. Participants will inhale through the mouthpiece according to a standardized procedure  
416 (i.e. inhale 5 seconds, hold 2 seconds, exhale and rest until 30s has elapsed) for a minimum of  
417 8 inhalations. If vapor is still observable in exhaled breath after these 8 inhalations, this  
418 procedure will continue until vapor is no longer seen. Appropriate training of the volunteers  
419 for the use of a Mighty Medic vaporizer will be performed during the training session, using  
420 the placebo. The preparation of the vaporizer will be done in the drug administration room by  
421 one of the researchers, out of sight for the participant. This researcher will not be present  
422 during the administration or during the testing of the subjects. The administration will take  
423 place in the waiting room with one of the researchers present.

#### 424 **7.5 Dosages, dosage modifications and method of administration.**

425 The amount of Bedrocan placebo (<0.2% THC & CBD) administered will be equivalent to  
426 215mg minus the amount of active plant material required in each condition to deliver 13.75  
427 mg THC / CBD.

#### 428 **7.6 Preparation and labelling of Non Investigational Medicinal Product**

429 Bedrocan placebo (<0.2% THC & CBD) will be delivered by the Office for Medicinal  
430 Cannabis, and the doses will be weighted and labelled in our drug storage room, using a  
431 calibrated digital MyWeigh scale (type i101).

#### 432 **7.7 Drug accountability**

433 The Office for Medicinal Cannabis will deliver the cannabis to the University where it will be  
434 placed immediately in a safe, in a cool and dark locked room. In the trial master file, there  
435 will be a drug accountability log where information about distribution and return will be  
436 registered.

437

## 438 8. METHODS

439

### 440 8.1 Study outcome measures

- 441 ○ Primary: Driving performance will be assessed using the on-road driving test.
- 442 Outcome measures will include standard deviation of lateral position (SDLP),
- 443 speed (MS) and standard deviation of speed (SDSP).
- 444 ○ Secondary: (1) Cognitive performance as assessed using the Divided Attention
- 445 Task (DAT), Digit Symbol Substitution Task (DSST), Paced Auditory Serial
- 446 Addition Task (PASAT), Tower of London (TOL) task; (2) Subjective drug
- 447 effects and confidence in driving ability as measured by a series of Visual Analog
- 448 Scales (VAS); Cannabis effects on anxiety as measured by the State Trait
- 449 Anxiety Inventory (STAI) and an emotional Stroop task, and; (3) Plasma
- 450 concentrations of THC, 11-OH-THC, THCCOOH and CBD.

#### 451 8.1.1 Primary outcomes

##### 452 Driving performance

453

##### 454 Road tracking test

455 In the road tracking test (O'Hanlon, 1984), the participant operates a specially instrumented  
456 vehicle over a 100 km primary highway circuit in The Netherlands (Maastricht-Kelpen-Oler)  
457 while maintaining a constant speed (95 km/h) and a steady lateral position between the  
458 delineated boundaries of the right (slower) traffic lane. An electro-optical device mounted at  
459 the rear back of the car continuously measures lateral distance separating the vehicle and the  
460 left lane-line. This signal is digitized at a rate of 4 Hz and stored on an onboard computer disk  
461 file for later editing analysis. The off-line editing routine involves removal of all data  
462 segments that reveal signal loss, disturbance or occurrence of passing manoeuvres. The  
463 remaining data are then used to calculate means and variances for lateral position and speed.  
464 Standard deviation of lateral position (SDLP) is taken as the primary outcome variable. SDLP  
465 is a measure of road tracking error, in practical terms, a composite index of allowed weaving,  
466 swerving and overcorrecting. Another outcome variable is mean speed, and standard deviation  
467 of speed, which is a measure of the accuracy of performance. The test duration is 60 minutes.

468

#### 469 8.1.2 Secondary outcomes

470

**471 Cognitive performance**

472

**473 Divided Attention Task (DAT)**

474 The DAT measures the subject's ability to divide attention between two tasks performed  
475 simultaneously. The primary task consists of a tracking task with an individually determined  
476 level of difficulty, while the secondary task involves monitoring a display of numbers and  
477 responding to only a certain number. Mean absolute tracking error, number of correct  
478 detections and number of control losses are the main performance measures [17]. This takes  
479 about 12 minutes to complete.

480

**481 Digit Symbol Substitution Task (DSST)**

482 The DSST measures speed of processing [18]. A series of 10 symbols are matched with  
483 numbers (1-10) Individual symbols are presented one at a time on the bottom of the screen,  
484 and subjects are required to respond by pressing the appropriate number associated with that  
485 symbol using the numerical keypad of a computer keyboard. Dependent variables include the  
486 number of items correct and the response time. The DSST takes 3 minutes to complete.

487

**488 Paced Auditory Serial Addition Test (PASAT)**

489 This computerized version of the PASAT measures information processing speed and  
490 working memory [19] . In this task, numbers are presented one at a time on the screen.  
491 Participants are required to add each number to the preceding number and input the sum of  
492 these two numbers using the numerical keypad of a computer keyboard. Dependent variables  
493 include the number of items correct and the response time. It takes approximately 5 minutes  
494 to complete the PASAT.

495

**496 Tower of London (TOL)**

497 The Tower of London (TOL) is a decision-making task that measures executive function and  
498 planning (Shallice, 1982). The task consists of computer-generated images of begin- and end-  
499 arrangements of three colored balls on three sticks. The subject's task is to determine as  
500 quickly as possible, whether the end-arrangement can be accomplished by "moving" the balls  
501 in two to five steps from the beginning arrangement by pushing the corresponding number  
502 coded button (Veale et al., 1996). The total number of correct decisions is the  
503 main performance measure. Completion of the TOL takes between 10 and 15 minutes.

504

**505 Subjective drug effects, perceived driving ability and pharmacokinetic measures****506 Emotional Stroop task**

507 This task [22] looks at differences in information processing between anxious and non-  
508 anxious individuals. During the training session, participants will practice this task with 80  
509 neutral words. On the test days, participants will be presented with 20 anxiety-related words  
510 and 20 anxiety-matched neutral words. All words will be presented twice in a mixed-trial  
511 (anxiety related/neutral at random). The colour the words are presented in are: blue, red,  
512 green, yellow. Outcomes include mean reaction time for the anxiety related words and neutral  
513 words and number of errors. Completion takes about 3 minutes.

514

**515 Visual analog scales (VAS)**

516 A series of 100mm VAS will ask participants to report:

517

- 518 1. Strength of drug effect (No effect – Very strong)
- 519 2. Liking of drug effect (Dislike very much – Like very much)
- 520 3. Stoned (Not stoned – Very stoned)
- 521 4. Sedated (Not sedated – Very sedated)
- 522 5. Relaxed (Not relaxed – Very relaxed)
- 523 6. Anxious (Not anxious – Very anxious)
- 524 7. Confident to drive (Not confident – Very confident)

525

**526 Perceived Driving Quality**

527

528 At the end of each driving task, a series of 100mm VAS will ask participant the following:

529

- 530 1. How would you rate the quality of your driving just now? (Very poor – Very good)
- 531 2. Compared to normal (i.e. when not stoned), how well do you think you drove? (Much  
532 worse – Much better)
- 533 3. Do you think your driving was impaired? (Not at all – Very much)

534

**535 State Trait Anxiety Inventory (STAI)**

536 This scale [20, 21] consists of two sections, Y-1 and Y-2, which assess state and trait anxiety,  
537 respectively. Section Y-2 (trait) will be administered during the training session, and section  
538 Y-1 (state) will be administered once during each research session. The outcome measure for  
539 both sections is the total score.

#### 540 Groningen Sleep Quality Scale (GSQS)

541 This scale [23] will be used to assess sleep quality during the nights preceding the testing  
542 days. Measurements consist of a total score of 14 yes/no questions to score the number of  
543 sleep complaints (ranging from good sleep [score = 0] to worst possible sleep [score = 14] and  
544 specific questions about time needed to fall asleep, number of awakenings during the night,  
545 and sleep duration in hours.

546

#### 547 Physiological measures

548 Blood pressure, heart rate and body temperature will be measured throughout each testing  
549 day.

550

#### 551 Pharmacokinetic measures

552 On each test day, blood samples will be collected at baseline, immediately after, 30 m, 2h  
553 15m, 3h 30m and 5h 30m after drug administration. 5 mL blood will be collected in purple  
554 top EDTA tubes and centrifuged for 10 minutes. Plasma will be extracted and stored at -20°C  
555 until analysis. Plasma will be analyzed for THC, THCCOOH, 11-OH-THC and CBD.

556

### 557 **8.2 Randomisation, blinding and treatment allocation**

558 Cannabis and placebo will be administered according to a balanced randomisation schedule  
559 containing 4 blocks of 6 (i.e. 24 total allocations). Allocation of the treatment order will be  
560 done in a completely random order, by one experimenter who does not come in direct contact  
561 with the subjects. The study will be double blind. One experimenter will be responsible for  
562 preparing the cannabis. This experimenter will not be the one testing the subjects. If a subject  
563 is withdrawn from the study, that treatment allocation will not be further used and the  
564 following subject will be given the next treatment allocation. Following completion of all  
565 data collection the study will be fully unblinded. If necessary, the study physician will break  
566 the blind on a study day.

### 567 **8.3 Study procedures**

#### 568 **8.3.1 Pre-screening**

569 Before subjects are invited for a medical examination, a brief pre-screening by email is  
570 conducted. This will include questions regarding the subject's frequency of cannabis  
571 consumption and driving history to determine potential eligibility for the study. If a subject  
572 appears eligible from the pre-screening, the information brochure for volunteers and the

573 informed consent form will be sent via email. The potential subject is given one week of time  
574 to read the information and decide whether or not to participate. If the decision is positive, the  
575 subject is invited for a medical screening.

### 576 **8.3.2 Medical screening and training day**

577 Before the medical screening commences, subjects must sign the informed consent form.  
578 After that, they are requested to fill out a drug and medical questionnaire. Eligible subjects are  
579 invited for a physical examination [including blood- and urine analyses (Haematology,  
580 Clinical Chemistry, Urinalysis and Virology) and ECG]. Subjects are informed that they will  
581 be notified about all incidental significant medical findings that occur during the study. In case  
582 participants do not want to be informed about these findings, they cannot participate in the  
583 study. When there is no medical objection for participation, subjects will be invited to  
584 participate in the research and a training day will be scheduled.

585

586 On the training day, participants will be asked to come in to the lab for approximately 2-3  
587 hours. Participants will be introduced to the on-road driving task, involving a detailed  
588 explanation of the task itself and a 1-hour practice drive on the course that will be used on test  
589 days. This allows participants to become thoroughly familiar with the vehicle itself and to  
590 become familiarized with the driving instructor. Participants will then practice each of the  
591 cognitive tasks in the lab. Participants will also practice the emotional Stroop task and  
592 complete the Y-2 (trait) section of the STAI.

593

### 594 **8.3.3 Test days**

595 Subjects will participate in 4 separate test days, each separated by a minimum period of 7  
596 days, and a maximum period of 28 days. Subjects will be asked to refrain from any drugs  
597 from 7 days prior to each test day, to make sure that subjects will no longer have a positive  
598 drug screen. Subjects are not allowed to use alcohol on the day prior to the experimental  
599 session and will be requested to arrive at the experimental session well rested. Subjects are  
600 requested to have a light breakfast at home and consume no more than their usual amount of  
601 caffeine. On the test day, participants will be picked up from their home in time to arrive at  
602 the lab at 9:00. Drug and alcohol screens will be performed first, using a saliva drug test and  
603 breathalyzer. In case of a positive screen for cocaine, alcohol, opiates, benzodiazepine,  
604 methamphetamine or amphetamine, subjects will be sent home to return to the laboratory at a  
605 later time. If the tests are negative, then the session will proceed.

606

607 Baseline measures will be administered, including the GSQS and VAS item. A cannula will  
 608 be inserted into the participant's non-dominant arm, and the first blood sample will be taken.  
 609 Approximately 45 minutes after arrival at the lab, participants will inhale Bedrocan, Bedrolite,  
 610 Bedrocan/Bedrolite or placebo vapor. An investigator will be present in the room while the  
 611 administration takes place. A second blood sample will be taken immediately after  
 612 vaporizing, when THC plasma concentrations are maximal. Participants will then complete  
 613 VAS items, the Y-1 section of the STAI, the three cognitive tests (DSST, PASAT and DAT),  
 614 and the emotional Stroop task. A third blood sample will be taken after these tests,  
 615 approximately 25 minutes after vaporizing. The first driving test will begin approximately 30  
 616 minutes after vaporizing (i.e. when plasma THC concentrations have declined considerably  
 617 but during peak subjective drug effects) and will run for 90 minutes, including the time  
 618 needed to leave and return to the lab. At the end of the driving test, a fourth blood sample will  
 619 be taken. Participants will then complete VAS items and the TOL task. Participants may take  
 620 short breaks in between tests when needed. Participants will then be given 45 minutes to rest  
 621 and have a standardized lunch.

622

623 A fifth blood sample will be taken at 13:10, after which participants will complete the second  
 624 cognitive test battery and VAS items. Following this, the second driving test will commence.  
 625 Once this has been completed, participants will provide a final blood sample and complete the  
 626 final set of VAS items. A saliva test will then be performed to confirm that the participants'  
 627 saliva is negative for THC. Participants will be discharged from the lab at approximately  
 628 15:30 and will be driven back to their home. In the case that this final saliva test is negative,  
 629 participants will remain at the lab and saliva testing will be repeated every 30 minutes until  
 630 such time as the test result is negative. If the researcher deems the participant unfit to leave  
 631 the lab safely, the participant will be reviewed by a medical practitioner and asked to remain  
 632 at the lab until such time as they are fit to go home. At the end of the fourth session, a short  
 633 debriefing will take place in which the aims of the study may be explained, and the  
 634 participants is asked whether he/she noticed on which days the cannabis/placebo were  
 635 received. An overview of the sessions is presented below:

636

| Activity                | Time post-drug | Duration (minutes) | Time Start | Time End |
|-------------------------|----------------|--------------------|------------|----------|
| Drug and alcohol screen | -40m           | 10                 | 9:00       | 9:10     |

|                                                                    |             |           |             |             |
|--------------------------------------------------------------------|-------------|-----------|-------------|-------------|
| Baseline questionnaire, GSQS, VAS                                  | -30m        | 10        | 9:10        | 9:20        |
| Cannulation & blood sample (1)                                     | -20m        | 10        | 9:20        | 9:30        |
| <b>Drug administration</b>                                         | <b>0</b>    | <b>10</b> | <b>9:40</b> | <b>9:50</b> |
| Blood sample (2)                                                   | Immediately | 5         | 9:50        | 9:55        |
| VAS, STAI, DAT, DSST, PASAT, Stroop                                | 5 min       | 20        | 9:55        | 10:15       |
| Blood sample (3)                                                   | 25 min      | 5         | 10:15       | 10:20       |
| VAS, Driving task (1)                                              | 30 min      | 90        | 10:20       | 11:50       |
| Blood sample (4)                                                   | 2 h 10 min  | 5         | 12:00       | 12:05       |
| VAS, TOL                                                           | 2 h 15 min  | 20        | 12:05       | 12:25       |
| Lunch and rest                                                     | 2 h 35 min  | 40        | 12:25       | 13:10       |
| Blood sample (5)                                                   | 3 h 20 min  | 5         | 13:10       | 13:15       |
| VAS, DAT, DSST, PASAT                                              | 3 h 25 min  | 15        | 13:15       | 13:30       |
| Driving task (2)                                                   | 3 h 50 min  | 90        | 13:40       | 15:10       |
| Blood sample (6), VAS, <u>saliva sample</u> , review and discharge | 5 h 20 min  | 20        | 15:10       | 15:30       |

637

638

#### 639 **8.4 Medical supervision during the study and emergency plan**

640 The medical supervisor will medically check all participants before they are included in the  
641 study (see 8.3.1). During the test days, a researcher will always accompany the participant  
642 during their time at the testing facilities. In case the participants report any side effects, the  
643 researcher will take the necessary steps:

- 644 - In case it requires no further action, the side effects will be noted (e.g. headache,  
645 feeling high).
- 646 - In case the side effect causes some minor discomfort (e.g. feeling dizzy), the subject  
647 will be asked to lie down, while a nearby staff member with first aid training will check  
648 out the subject. If needed, the medical doctor will be called to determine what action  
649 should be taken. It will be determined by the participant and the medical doctor  
650 whether the participant can continue the test day.
- 651 - In case of more severe side effects (e.g. losing consciousness), the medical doctor will  
652 be informed immediately, a nearby staff member with first aid training will be called



653 upon, and if needed, the participant will be brought to the first aid department of the  
654 Maastricht Hospital or an ambulance will be called. The testing day will be stopped  
655 and it will be evaluated by the medical doctor and principal investigator whether the  
656 study can continue.

657

658 **Additional safety measures:** A list with phone numbers of all researchers involved, the  
659 medical doctor, and staff member with first aid training will be clearly visible in all rooms  
660 used during the experiment. In addition, the researcher who will accompany the participant  
661 will always carry his mobile phone with these phone numbers. All researchers will be  
662 informed about the emergency plan.

### 663 **8.5 Withdrawal of individual subjects**

664 Subjects can leave the study at any time for any reason if they wish to do so without any  
665 consequences. The investigator can decide to withdraw a subject from the study for urgent  
666 medical reasons.

### 667 **8.6 Replacement of individual subjects after withdrawal**

668 If a volunteer drops out of the study, that treatment allocation will have been used and the  
669 subsequent volunteer will be assigned to the next treatment allocation. 24 participants will be  
670 recruited to the study in total, allowing for a potential drop-out rate of ~15% to ensure that at  
671 least 20 participants finish the entire study. Any test day on which a subject has been  
672 administered study medication and on which tests cannot be conducted, due to unforeseeable  
673 technical failures (e.g. computer malfunction) that occurred after drug administration, can be  
674 repeated on the next visit of the subject using spare medication. When this will occur, another  
675 person, not directly involved in this research will unblind the code for this subject and take  
676 spare medication.

### 677 **8.7 Follow-up of subjects withdrawn from treatment**

678 In case a subject withdraws or is withdrawn from the study due to an AE or SAE the usual  
679 procedures will be followed as stated in section 9 of this protocol.

### 680 **8.8 Premature termination of the study**

681 Study termination is defined as a permanent discontinuation of the study due to unanticipated  
682 concerns of safety to the study subjects.

683

## 684 9. SAFETY REPORTING

685

### 686 9.1 Temporary halt for reasons of subject safety

687 In accordance to section 10, subsection 4, of the WMO, the sponsor will suspend the study  
688 if there is sufficient ground that continuation of the study will jeopardise subject health or  
689 safety. The sponsor will notify the accredited METC without undue delay of a temporary  
690 halt including the reason for such an action. The study will be suspended pending a further  
691 positive decision by the accredited METC. The investigator will take care that all subjects  
692 are kept informed.

693

### 694 9.2 AEs, SAEs and SUSARs

#### 695 9.2.1 Adverse events (AEs)

696 Adverse events are defined as any undesirable experience occurring to a subject during  
697 the study, whether or not considered related to [the investigational product / the  
698 experimental intervention]. All adverse events reported spontaneously by the subject  
699 or observed by the investigator or his staff will be recorded.

#### 700 9.2.2 Serious adverse events (SAEs)

701 A serious adverse event is any untoward medical occurrence or effect that at any dose:

- 702 - results in death;
- 703 - is life threatening (at the time of the event);
- 704 - requires hospitalisation or prolongation of existing inpatients' hospitalisation;
- 705 - results in persistent or significant disability or incapacity;
- 706 - is a congenital anomaly or birth defect;
- 707 - Any other important medical event that may not result in death, be life threatening,  
708 or require hospitalization, may be considered a serious adverse experience when,  
709 based upon appropriate medical judgement, the event may jeopardize the subject or  
710 may require an intervention to prevent one of the outcomes listed above.

711

712 The sponsor will report the SAEs through the web portal *ToetsingOnline* to the  
713 accredited METC that approved the protocol, within 15 days after the sponsor has first  
714 knowledge of the serious adverse reactions.

715

716 SAEs that result in death or are life threatening should be reported expedited. The  
717 expedited reporting will occur not later than 7 days after the responsible investigator  
718 has first knowledge of the adverse reaction. This is for a preliminary report with  
719 another 8 days for completion of the report.

### 720 **9.2.3 Suspected unexpected serious adverse reactions (SUSARs)**

721 Not applicable

### 722 **9.3 Annual safety report**

723 Not applicable

### 724 **9.4 Follow-up of adverse events**

725 All AEs will be followed until they have abated, or until a stable situation has been  
726 reached. Depending on the event, follow up may require additional tests or medical  
727 procedures as indicated, and/or referral to the general physician or a medical specialist.  
728 SAEs need to be reported till end of study within the Netherlands, as defined in the  
729 protocol

### 730 **9.5 [Data Safety Monitoring Board (DSMB) / Safety Committee]**

731 Not applicable for this study.

732

## 733 **10. STATISTICAL ANALYSIS**

734  
735 Statistical analyses of drug effects on driving, cognitive test performance and subjective  
736 measures will be conducted in SPSS using a linear mixed model design with treatment  
737 (THC, THC/CBD, CBD, placebo) and time (time since drug administration) as fixed  
738 factors. The appropriate covariance structure for each model will be chosen based on  
739 model fit criterion (e.g. AIC). Bonferroni pair-wise comparisons will be used to test for  
740 differences between treatment means at each timepoint. Separate models will test the  
741 influence of plasma THC concentrations on driving and cognitive test performance at each  
742 individual timepoint by including treatment and plasma THC at fixed factors. Associations  
743 between perceived driving ability and actual driving will be analysed using correlational  
744 analyses. All data will enter statistical analyses, including incomplete datasets due to  
745 missing data. Data will only be left out of analyses in the case where a participant  
746 withdraws his/her consent and requests that his/her data will not be used.

747

## 748 11. ETHICAL CONSIDERATIONS

749

### 750 11.1 Regulation statement

751 This study will be conducted according to the code of ethics on human experimentation  
752 established by the declaration of Helsinki (1964) and amended in Fortaleza (Brazil,  
753 October 2013) and in accordance with the Medical Research Involving Human Subjects  
754 Act (WMO). This implies that all subjects will participate voluntarily and will be fully  
755 informed of all procedures, possible adverse reactions to drug treatments, legal rights and  
756 responsibilities, expected benefits of a general scientific nature, and their right for  
757 voluntary termination without penalty or censure. All subjects shall give their informed  
758 consent, in writing, and the individual subject's anonymity shall be maintained in all  
759 communications from the project. Approval for the studies shall be obtained from the  
760 Academic Hospital and University's Medical Ethics committee.

761 All data will be treated confidentially using codes and only the researchers involved in the  
762 study will have access to the data. All human tissue that is gathered during the study will  
763 be destroyed 6 months after completion of the study. An independent physician is at the  
764 subjects' disposal for additional information. Subjects are offered the possibility to be  
765 informed about the results of the study.

### 766 11.2 Recruitment and consent

767 Participants will be recruited through various mediums from Maastricht and the  
768 surrounding area. Advertisements will be put up in the University buildings (e.g. in  
769 Maastricht: FPN, SBE, inner city library), and a call for participants will also be published  
770 in local newspapers (Maastricht: e.g. "De Limburger", "1Maastricht"). Online enrolment  
771 systems (SONA) will also be used as well as social media channels (e.g. Facebook,  
772 Twitter). It is anticipated that participants will also be notified of the study via word of  
773 mouth. When potential subjects react to the advertisement, they will be pre-screened by  
774 email/phone for eligibility. If they appear eligible, they receive the brochure 'information  
775 for volunteers' and informed consent form, which they are requested to read carefully.  
776 From this point, they have one week of time to decide whether they want to participate or  
777 not, and if they do they are invited for a medical screening. Before the medical screening  
778 starts, subjects will be fully informed of all procedures, possible adverse reactions to drug  
779 treatments, legal rights and responsibilities, expected benefits of a general scientific nature,  
780 and their right for voluntary termination without consequences. Subjects will then be asked

781 to sign the informed consent and to fill in the medical questionnaire and drug  
782 questionnaire. One of the researchers and the medical doctor will check all in- and  
783 exclusion criteria. Subjects are subsequently informed whether they fulfil the criteria or  
784 not. In case they are suited for participation, a physical examination is conducted. All  
785 subjects shall give their informed consent, in writing, and the individual subject's  
786 anonymity shall be maintained in all communications from the project. After consent has  
787 been given, data will be collected by experimenters and will be encoded. All collected and  
788 encoded urine and blood samples will be destroyed after 6 months. The blood and urine  
789 samples will be labelled with codes of the study ID, date, testing day, and participant  
790 number.

### 791 **11.3 Objection by minors or incapacitated subjects (if applicable)**

792 Not applicable

### 793 **11.4 Benefits and risks assessment, group relatedness**

794 A workshop on pharmacology challenge studies convened by the National Institute of  
795 Mental Health (NIMH) concluded that drug studies can be considered ethical provided that  
796 two conditions are met [24]:

797 *1) there must be sufficient and clear scientific merit to the study in the form of testable*  
798 *hypotheses that will provide new knowledge.* We think that for the present study this is  
799 sufficiently met. In many criminal cases (occasional) drug use plays a role; however, the  
800 implications for witnesses' and perpetrators' testimony have not been sufficiently  
801 investigated.

802 *2) the risks must be minimized and justified in terms of potential scientific gains.* We  
803 believe that the risk is kept to a minimal in this study. The acute effects of Bedrobinol are  
804 well known, and similar doses have been used in our previous studies.

805

806 Cannabis: The effects of THC occur very rapidly after inhalation and disappear within 2 to  
807 3 hours. The given dose has been given to participants in previous studies with nil adverse  
808 events and is well tolerated in recreational cannabis users. Expected effects include mild  
809 relaxation, alteration of visual, auditory, and olfactory senses, fatigue, and appetite  
810 stimulation. Serious acute adverse effects of cannabis may include anxiety and panic  
811 attacks, tachycardia and an increase in blood pressure, however these are typically induced  
812 at much higher doses than what will be administered in this study. Placebo cannabis is not

813 expected to cause any side effects, given that the concentrations of present active  
814 cannabinoids are at negligible levels.

### 815 **11.5 Compensation for injury**

816 In accordance with the provisions of the law Maastricht University has a liability insurance  
817 which is in accordance with article 7 of the WMO.

818

819 The sponsor (also) has an insurance which is in accordance with the legal requirements in  
820 the Netherlands (Article 7 WMO and the Measure regarding Compulsory Insurance for  
821 Clinical Research in Humans of 23th June 2003). This insurance provides cover for  
822 damage to research subjects through injury or death caused by the study.

- 823 1. € 650.000,-- (i.e. four hundred and fifty thousand Euro) for death or injury for each  
824 subject who participates in the Research;
- 825 2. € 5.000.000,-- (i.e. three million five hundred thousand Euro) for death or injury  
826 for all subjects who participate in the Research;
- 827 3. € 7.500.000,-- (i.e. five million Euro) for the total damage incurred by the  
828 organisation for all damage disclosed by scientific research for the Sponsor as  
829 ‘verrichter’ in the meaning of said Act in each year of insurance coverage.

830

831 The insurance applies to the damage that becomes apparent during the study or within 4  
832 years after the end of the study.

### 833 **11.6 Incentives (if applicable)**

834 Subjects will be compensated for their participation by means of a monetary reward.  
835 Participants will receive € 400 for their participation in the study. This is based on € 75  
836 per test day, plus € 30 for their time coming in for the medical assessment and training  
837 day. Upon completion of all 4 test days they will receive a bonus of € 70. In case of  
838 premature termination of the study will be based on the number of test days on which it is  
839 paid. In addition, participants will be brought to and from their home to the lab on test  
840 sessions, and will be provided with lunch on study test days.

841

## 842 **12. ADMINISTRATIVE ASPECTS, MONITORING AND PUBLICATION**

843

### 844 **12.1 Handling and storage of data and documents**

845 All data and blood samples will be labelled with a code that consists of the following  
846 information:

- 847 - Project number: 112
- 848 - Subject number: assigned based on order of inclusion
- 849 - Test day: test day 1 is labelled A; test day 2: B; test day 3: C, test day 4: D
- 850 - In case a test is repeatedly administered on a test day, the repetitions will be labelled: 1-
- 851 ....

852 All data is collected in electronic and paper format. Data from the questionnaires is  
853 collected on paper. These (paper) source data will be kept in a locked cabinet to which  
854 only researchers involved in the project have access. Electronic source data is stored on a  
855 partition of a server (hosted in the University Building) which is only accessible to the  
856 research team. The key code is safeguarded by the principal investigator. Data will also be  
857 accessible by the IGJ and monitors. The data will be kept for 15 years. Blood and urine  
858 samples from the medical screening and those collected on test days are destroyed after 6  
859 months. Only anonymous data will be shared with The University of Sydney. This data  
860 will be transferred electronically via CloudStor (an enterprise level secure file sharing  
861 platform that is used by Australian research and educational institutions) once data  
862 collection is complete and stored on a secure University of Sydney server where it will be  
863 password protected and accessible only to members of the Sydney research team.

864

### 865 **12.2 Monitoring and Quality Assurance**

866 Monitoring of the study will take place. The monitor (Nadia Hutten) will conduct two  
867 visits in which she will (for details: see monitoring plan):

- 868 - do the verification of the source documentation
- 869 - check the drug accountability plan
- 870 - check the trial master file
- 871 - discuss the results of the visit and write a report

872

### 873 **12.3 Amendments**

874 Amendments are changes made to the research after a favourable opinion by the  
875 accredited METC has been given. All amendments will be notified to the METC that gave  
876 a favourable opinion.

877

**878 12.4 Annual progress report**

879 The sponsor/investigator will submit a summary of the progress of the trial to the  
880 accredited METC once a year. Information will be provided on the date of inclusion of the  
881 first subject, numbers of subjects included and numbers of subjects that have completed  
882 the trial, serious adverse events/ serious adverse reactions, other problems, and  
883 amendments.

**884 12.5 Temporary halt and (prematurely) end of study report**

885 The sponsor will notify the accredited METC and of the end of the study within a period  
886 of 8 weeks. The end of the study is defined as the last patient's last visit.

887 The sponsor will notify the METC immediately of a temporary halt of the study, including  
888 the reason of such an action.

889 In case the study is ended prematurely, the sponsor will notify the accredited METC  
890 within 15 days, including the reasons for the premature termination.

891 Within one year after the end of the study, the sponsor will submit a final study report  
892 with the results of the study, including any publications/abstracts of the study, to the  
893 accredited METC.

**894 12.6 Public disclosure and publication policy**

895 All results from this research will be disclosed unreservedly in a scientific paper aimed for  
896 publication in a peer reviewed scientific journal. Research data collected in the current  
897 study will be owned by Maastricht University.

898

**899 13. STRUCTURED RISK ANALYSIS**

900

**901 13.1 Potential issues of concern****902 a. Level of knowledge about mechanism of action**

903 The mechanism of action of THC is well known. THC exerts its most prominent effects via  
904 its actions on two types of cannabinoid receptors, the CB<sub>1</sub> receptor and the CB<sub>2</sub> receptor.  
905 The CB<sub>1</sub> receptor is found primarily in the brain, and the CB<sub>2</sub> receptor is found primarily  
906 in peripheral tissues. THC alters mood and cognition through its agonist actions on the  
907 CB<sub>1</sub> receptors, which inhibit a secondary messenger system in a dose dependent manner.



908 Via CB1 activation, THC indirectly increases dopamine release and produces psychotropic  
909 effects.

910 b. Previous exposure of human beings with the test product(s) and/or products with a  
911 similar biological mechanism

912 The effects of THC on humans are well classified, and we have used similar doses to look  
913 at the effects of THC on cognition and driving previously [25-28]

914

915 c. Can the primary or secondary mechanism be induced in animals and/or in *ex-vivo* human  
916 cell material?

917 No, we are specifically interested in drug effects on driving and cognition.

918

919 d. Selectivity of the mechanism to target tissue in animals and/or human beings

920 We will study changes in driving and cognitive performance during and after THC  
921 intoxication in humans.

922

923 e. Analysis of potential effect

924 The effects of THC occur very rapidly after inhalation and disappear within 2 to 3 hours.

925 The given dose is well tolerated in recreational cannabis users, and will induce effects such  
926 as relaxation, alteration of visual, auditory, and olfactory senses, fatigue, and appetite  
927 stimulation. The most important acute adverse effects of a high dose of cannabis are  
928 anxiety and panic attacks, and with regard to somatic effects increased heart rate and  
929 changes in blood pressure.

930 f. Pharmacokinetic considerations

931 THC is very rapidly absorbed in the blood stream and reaches peak concentration (Tmax)  
932 within minutes after smoking [29]. THC is also rapidly eliminated as evidenced by a 50%  
933 reduction a THC concentration in blood within 1.5 hrs after cannabis smoking [30].

934

935 g. Study population

936 Participants will be occasional cannabis users (cannabis use <2x/week in previous 12  
937 months and >10 lifetime exposures) aged between 18 and 65 years. All subjects will be  
938 medically screened. Inclusion and exclusion criteria are mentioned under section 4.2 and  
939 4.3.

940  
941  
942  
943  
944  
945  
946  
947  
948  
949  
950  
951  
952  
953  
954  
955  
956  
957  
958  
959  
960  
961  
962  
963  
964  
965  
966  
967  
968  
969

#### h. Interaction with other products

Participants are not allowed to use any psychoactive medication within 5 days before each test day until the end of the study. Use of drugs like painkillers (e.g. ibuprofen, aspirin, paracetamol) and oral contraceptives will be allowed during the study. Therefore, there will be no risk of drug interactions.

#### i. Predictability of effect

The effects of cannabis on driving are well documented [31]. At low doses, cannabis' effects on driving are nominal, and typically do not exceed those associated with 0.05% BAC. At high doses and in naïve users, the effects are more pronounced and can be significantly impairing.

#### j. Can effects be managed?

Effects will disappear as the drug is eliminated from the body.

### **13.2 Synthesis**

This will be the first study to investigate the effects of different cannabis chemovars (with and without CBD) on real-world driving performance. Occasional cannabis users will receive cannabis (equivalent to 13.75mg THC and CBD) and will complete two on-road driving tasks and a series of cognitive tests and subjective measures during acute and post-acute intoxication phases. This is the first study of its kind, and is highly relevant given the increasing prevalence of medicinal cannabis use globally.

970 **14. REFERENCES**

- 971
- 972 1. Resstel, L.B., et al., *5-HT1A receptors are involved in the cannabidiol-induced attenuation of*  
 973 *behavioural and cardiovascular responses to acute restraint stress in rats*. *Br J Pharmacol*,  
 974 2009. **156**(1): p. 181-8.
- 975 2. Zhornitsky, S. and S. Potvin, *Cannabidiol in humans—the quest for therapeutic targets*.  
 976 *Pharmaceuticals*, 2012. **5**(5): p. 529-552.
- 977 3. Ashton, C.H., *Pharmacology and effects of cannabis: a brief review*. *The British Journal of*  
 978 *Psychiatry*, 2001. **178**(2): p. 101-106.
- 979 4. Cuba, L., et al., *Cannabidiol: an alternative therapeutic agent for oral mucositis?* *Journal of*  
 980 *clinical pharmacy and therapeutics*, 2017.
- 981 5. Mannucci, C., et al., *Neurological Aspects of Medical Use of Cannabidiol*. *Cns & Neurological*  
 982 *Disorders-Drug Targets*, 2017. **16**(5): p. 541-553.
- 983 6. Machado Bergamaschi, M., et al., *Safety and side effects of cannabidiol, a Cannabis sativa*  
 984 *constituent*. *Current drug safety*, 2011. **6**(4): p. 237-249.
- 985 7. Iffland, K. and F. Grotenhermen, *An Update on Safety and Side Effects of Cannabidiol: A Review*  
 986 *of Clinical Data and Relevant Animal Studies*. *Cannabis and cannabinoid research*, 2017. **2**(1):  
 987 p. 139-154.
- 988 8. Martin-Santos, R., et al., *Acute effects of a single, oral dose of d9-tetrahydrocannabinol (THC) and*  
 989 *cannabidiol (CBD) administration in healthy volunteers*. *Curr Pharm Des*, 2012. **18**(32): p.  
 990 4966-79.
- 991 9. Bhattacharyya, S., et al., *Opposite effects of delta-9-tetrahydrocannabinol and cannabidiol on*  
 992 *human brain function and psychopathology*. *Neuropsychopharmacology*, 2010. **35**(3): p. 764-  
 993 74.
- 994 10. Laprairie, R., et al., *Cannabidiol is a negative allosteric modulator of the cannabinoid CBI*  
 995 *receptor*. *British journal of pharmacology*, 2015. **172**(20): p. 4790-4805.
- 996 11. Fusar-Poli, P., et al., *Distinct effects of Δ9-tetrahydrocannabinol and cannabidiol on neural*  
 997 *activation during emotional processing*. *Archives of General Psychiatry*, 2009. **66**(1): p. 95-  
 998 105.
- 999 12. Rekan, T., *THC: CBD spray and MS spasticity symptoms: data from latest studies*. *European*  
 1000 *neurology*, 2014. **71**(Suppl. 1): p. 4-9.
- 1001 13. Bosker, W.M., et al., *Medicinal Δ9-tetrahydrocannabinol (dronabinol) impairs on-the-road driving*  
 1002 *performance of occasional and heavy cannabis users but is not detected in Standard Field*  
 1003 *Sobriety Tests*. *Addiction*, 2012. **107**(10): p. 1837-1844.
- 1004 14. Kowal, M.A., et al., *Dose-dependent effects of cannabis on the neural correlates of error*  
 1005 *monitoring in frequent cannabis users*. *European Neuropsychopharmacology*, 2015. **25**(11): p.  
 1006 1943-1953.
- 1007 15. Kowal, M.A., et al., *Cannabis and creativity: highly potent cannabis impairs divergent thinking in*  
 1008 *regular cannabis users*. *Psychopharmacology*, 2015. **232**(6): p. 1123-1134.
- 1009 16. de Bruijn, S.E., et al., *Explorative Placebo-Controlled Double-Blind Intervention Study with Low*  
 1010 *Doses of Inhaled Δ9-Tetrahydrocannabinol and Cannabidiol Reveals No Effect on Sweet*  
 1011 *Taste Intensity Perception and Liking in Humans*. *Cannabis and cannabinoid research*, 2017.  
 1012 **2**(1): p. 114-122.
- 1013 17. Moskowitz, H., *Laboratory studies of the effects of alcohol on some variables related to driving*.  
 1014 *Journal of Safety Research*, 1973.
- 1015 18. Mcleod, D.R., et al., *An Automated Version of the Digit Symbol Substitution Test (Dsst)*. *Behavior*  
 1016 *Research Methods & Instrumentation*, 1982. **14**(5): p. 463-466.
- 1017 19. Vandrey, R., et al., *Pharmacokinetic Profile of Oral Cannabis in Humans: Blood and Oral Fluid*  
 1018 *Disposition and Relation to Pharmacodynamic Outcomes*. *J Anal Toxicol*, 2017. **41**(2): p. 83-  
 1019 99.
- 1020 20. Spielberger, C.D., *Manual for the State-Trait Anxiety Inventory STAI (form Y) ("self-evaluation*  
 1021 *questionnaire")*. 1983.
- 1022 21. Spielberger, C.D., *STAI manual for the state-trait anxiety inventory*. *Self-Evaluation Questionnaire*,  
 1023 1970: p. 1-24.
- 1024 22. Richards, A., et al., *Effects of mood manipulation and anxiety on performance of an emotional*  
 1025 *Stroop task*. *British Journal of Psychology*, 1992. **83**(4): p. 479-491.

- 1026 23. van der Meulen, W.M.-H., et al. *Measurement of subjective sleep quality*. in *Amsterdam: Fifth*  
1027 *European Sleep Congress of the European Sleep Research Society*. 1980.
- 1028 24. Lieberman, J.A. and G.K. Aghajanian, *Caveat empor, researcher beware*.  
1029 *Neuropsychopharmacology*, 1999. **21**: p. 471-473.
- 1030 25. Veldstra, J.L., et al., *Comparing treatment effects of oral THC on simulated and on-the-road*  
1031 *driving performance: testing the validity of driving simulator drug research*.  
1032 *Psychopharmacology (Berl)*, 2015. **232**(16): p. 2911-9.
- 1033 26. Ramaekers, J.G., et al., *Cognition and motor control as a function of Delta9-THC concentration in*  
1034 *serum and oral fluid: limits of impairment*. *Drug & Alcohol Dependence*, 2006. **85**(2): p. 114-  
1035 22.
- 1036 27. Ramaekers, J.G., et al., *High-potency marijuana impairs executive function and inhibitory motor*  
1037 *control*. *Neuropsychopharmacology*, 2006. **31**(10): p. 2296-2303.
- 1038 28. Lamers, C.T. and J.G. Ramaekers, *Visual search and urban driving under the influence of*  
1039 *marijuana and alcohol*. *Hum Psychopharmacol*, 2001. **16**(5): p. 393-401.
- 1040 29. Huestis, M.A., J.E. Henningfield, and E.J. Cone, *Blood cannabinoids. I. Absorption of THC and*  
1041 *formation of 11-OH-THC and THCCOOH during and after smoking marijuana*. *Journal of*  
1042 *analytical Toxicology*, 1992. **16**(5): p. 276-282.
- 1043 30. Kauert, G.F., et al., *Pharmacokinetic properties of delta9-tetrahydrocannabinol in serum and oral*  
1044 *fluid*. *Journal of Analytical Toxicology*, 2007. **31**(5): p. 288-93.
- 1045 31. Hartman, R.L. and M.A. Huestis, *Cannabis effects on driving skills*. *Clinical Chemistry*, 2013.  
1046 **59**(3): p. 478-92.  
1047
