# Supplementary material
Source: PubMed Central journal article supplement (PMC7709000)
Supplement: jama-e2021218-s003.pdf [file jama-e2021218-s003.pdf]

## Data Sharing Statement

### Data

**Data available:** Yes

**Data types:** Deidentified participant data

**How to access data:** [iain.mcgregor@sydney.edu.au](mailto:iain.mcgregor@sydney.edu.au)

**When available:** With publication

### Supporting Documents

**Document types:** None

### Additional Information

**Who can access the data:** Requests for further information (e.g. statistical code) will be considered. Please send any requests to [j.ramaekers@maastrichtuniversity.nl](mailto:j.ramaekers@maastrichtuniversity.nl).

**Types of analyses:** For research purposes.

**Mechanisms of data availability:** With a signed data access agreement.
